# Supplementary material
Source: publisher site journal article supplement (https://www.dovepress.com/article/524436)
Supplement: Supplementary file 1 [file 524436%20Supplementary%20Material.docx]

**Supplementary material 1:** CHD patients interview outline.

(1) Have you participated in physical exercise in your daily life since you suffered from coronary heart disease? (2) Could you tell me why you participate in physical exercise after falling ill and what benefits do you think would bring you? Have you encountered any factors or situations that hinder your participation in exercise? (3) If you did not participate in physical exercise after falling ill, please tell me the reasons. What do you think are the factors that hinder your participation in physical exercise?

**Supplemental material 2:** Criteria for expert selection.

(1) Cardiologist, nurse, cardiac rehabilitation physician, or psychosomatic physician. (2) Associate senior or higher professional titles or doctoral degrees. (3) A working experience of over 10 years. (4) Familiar with the scale development process, informed consent and voluntary participation.

**Supplemental material 3:** Contents and rating score of the expert inquiry questionnaire

The questionnaire of expert inquiry mainly includes the description of inquiry, the importance score of dimension and item, expert general information, expert familiarity and judgment basis**.** The items are scored for relevance using a 5-point Likert scale (1 = irrelevant, 2 = less relevant, 3 = neutral, 4 = relevant, 5 = strongly relevant), and there is a column for expert opinions, including options such as "agree", "need to modify", "disagree", as well as a detailed column for expert modification opinions.

**Supplementary material 4:** Table S1 Revision status of items after the first round of expert inquiry

Table S1 Revision status of items after the first round of expert inquiry

| Dimension | Item | Expert revision comments | Modification | Disposition |
| --- | --- | --- | --- | --- |
| Physiological/  physical function | 1.Exercise is beneficial for controlling my high blood pressure |  |  | retain |
|  | 2.Exercise is beneficial for increasing vascular elasticity and improving cardiovascular function |  | Low average and full score ratio | delete |
|  | 3.Exercise is beneficial for blood circulation | Merge items 3 and 4 | Revise to "Beneficial for regulating blood lipids" | merge |
|  | 4.Exercise is beneficial for reducing blood lipids and cholesterol | Merge items 3 and 4 |  | merge |
|  | 5.Exercise can reduce relapses and readmission | The information in the statement is incomplete because it is not clearly stated what needs to be readmitted. | Revise to "Exercise Can help maintain stable heart function and reduce readmission times" | retain |
|  | 6.Exercise can enhance muscle strength |  | Low average and full score ratio | delete |
|  | 7.Exercise can increase my physical fitness | The meaning of the term "physical fitness" is too broad. | Revise to“Exercise can help me improve my activity endurance” | retain |
|  | 8.Exercise can control my weight  9.Exercise can alleviate physical dysfunction | Need to supplement weight range | Revise to“Exercise can control my weight to maintain normal/stable”  Low average and full score ratio | retain  delete |
|  | 10.Exercise can enhance the body's immune system and prevent the occurrence of colds |  |  | retain |
|  | 11.Exercise can improve my appetite |  | Low average and full score ratio | delete |
|  | 12.Exercise can improve my gastrointestinal function | Clarify what gastrointestinal function refers to? Does it refer to constipation or exhaust? | Revise to“Exercise can promote food digestion and improve appetite” | retain |
|  | 13.Exercise can help me sleep better and have better sleep quality | What does better sleep quality refer to? Does it mean longer sleep time? Specific explanation is needed here. | Revised to“Exercise makes me fall asleep faster and sleep longer.” | retain |
|  | 14.Exercise can reduce fatigue |  | Low average and full score ratio | delete |
| Quality of life | 15.Exercise can make my mood better | Does this item mean that exercise makes me feel better, or reduce anxiety or depression? | Revised to“Exercise can help improve negative emotions such as anxiety and depression” | retain |
|  | 16.Exercise can boost my mental state | Merge with item 13 |  | merge |
|  | 17.Exercise can improve my quality of life |  |  | retain |
|  | 18.Exercise can help me better integrate into family and social life |  | Low average and full score ratio | delete |
|  | 1. Exercise can bring me a sense of achievement |  |  | retain |
|  | 20.Exercise can alleviate my sense of guilt about illness |  | Low average and full score ratio | delete |
|  | Objective condition |  |  |  |
|  | 21.My residence lacks space for exercise |  | Low average and full score ratio | delete |
|  | 22.I lack the equipment needed for exercise |  | Low average and full score ratio | delete |
|  | 23.There is no exercise venue near my home | The statement is not yet standardized enough. | Revised to“Lack of space is one of the reasons that hinders me from doing exercise” | retain |
|  | 24.I don't have time to exercise |  |  | retain |
|  | Lack of social support |  |  |  |
|  | 25.I don't have family or friends to exercise with me |  |  | retain |
|  | 26.No one guides me to exercise |  |  | retain |
|  | 27.No family cares if I should exercise |  | Low average and full score ratio | delete |
|  | 28.My family always worries about my exercise problems and doesn't encourage me to exercise |  |  | retain |
|  | 29.Medical staff lack encouragement for me to persist in exercising | Usually, medical staff encourage patients to participate in more physical exercise. | Low average and full score ratio | delete |
| Poor exercise perception | 30.I lack understanding of the benefits of exercise |  |  | retain |
|  | 1. I lack understanding of exercise methods |  |  | retain |
|  | 32.I have never had the habit of exercising my body |  | Low average and full score ratio | delete |
|  | 33.I don't have the physical strength to participate in exercise |  | Low average and full score ratio | delete |
|  | 34.I feel that my physical condition is not suitable for exercise | Merge with item 35 | Revised to“I think coronary heart disease patients should not participate in exercise” | retain |
|  | 35.I think I should take more rest | Merge with item 34 |  | retain |
|  | 36.I think going out for exercise is very troublesome and inconvenient |  | Low average and full score ratio | delete |
|  | 37.I think exercising takes up too much time | Merge with item 24 |  | merge |
| Psychological factor | 38.I'm worried that going out for exercise will cause trouble for my family/ others |  | Low average and full score ratio | delete |
|  | 39.I'm worried that others might think I'm a patient and wouldn't dare to exercise with me |  | Low average and full score ratio | delete |
| Poor exercise experience | 40.After exercising, I may become thirsty, but I can’t drink too much water |  | Low average and full score ratio | delete |
|  | 41.I often feel tired after exercising | Supplement the consequences of fatigue caused by exercise. | Revised to“I don't want to continue exercising due to fatigue caused by exercise” | retain |
|  | 42.I feel that exercising will increase body pain |  | Low average and full score ratio | delete |
|  | 43.I am afraid that exercising will increase the risk of falls |  | Low average and full score ratio | delete |
|  | 44.I am afraid of breathing difficulties after or during exercise | Merge with item 45 |  | retain |
|  | 45.I am worried that exercise may cause arrhythmia and tachycardia | Merge with item 44 | Revised to“I am afraid that doing exercise will increase my heart rate” | retain |
|  | 46.I am worried that exercise will increase the burden on my heart |  | Low average and full score ratio | delete |
|  | 47.I'm worried that exercise may cause the stent to fall off or move inside my body |  | Low average and full score ratio | delete |
|  | 48.I'm worried that exercise may trigger another heart attack (myocardial infarction) |  |  | retain |
